# Supplementary material
Source: MDPI journal article supplement (https://www.mdpi.com/2073-445X/13/1/1)
Supplement: s1 [file s1]

# **Agisoft Metashape Drone data Feb 2023 Uganda**

**Report processing drone data - Elgon - Uganda - Hosea Opedes & Sander Mucher  
(WUR)**

**28 February 2023**

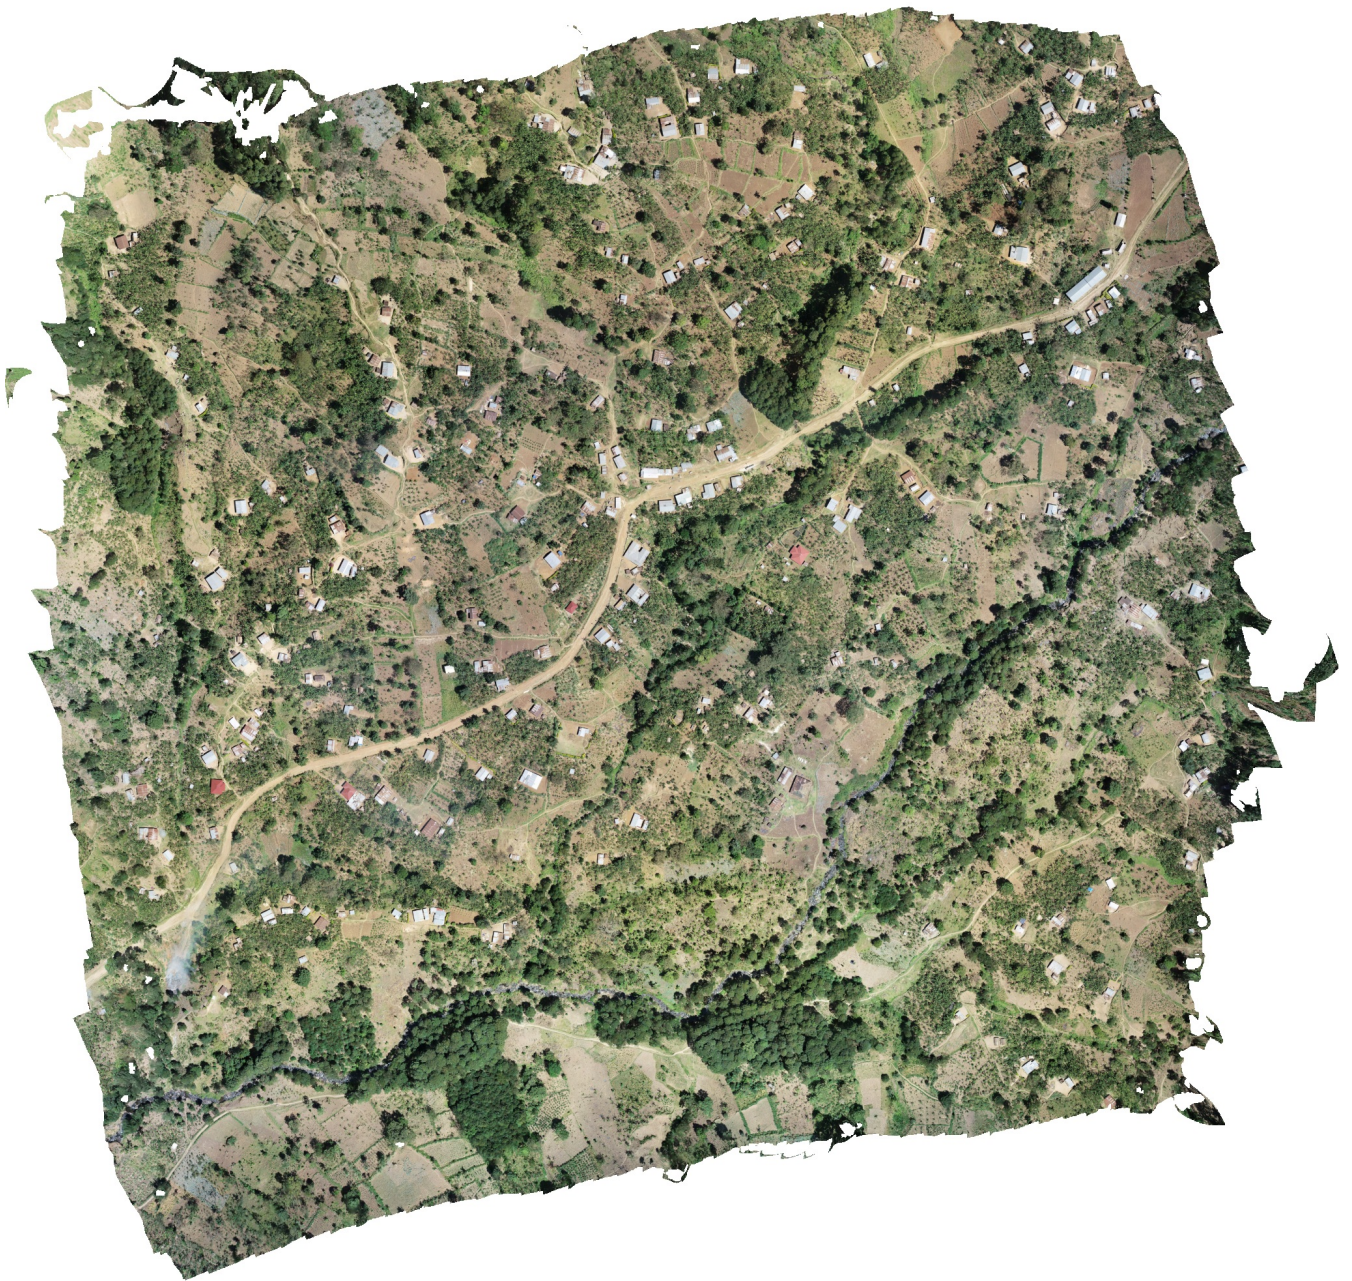

# Survey Data

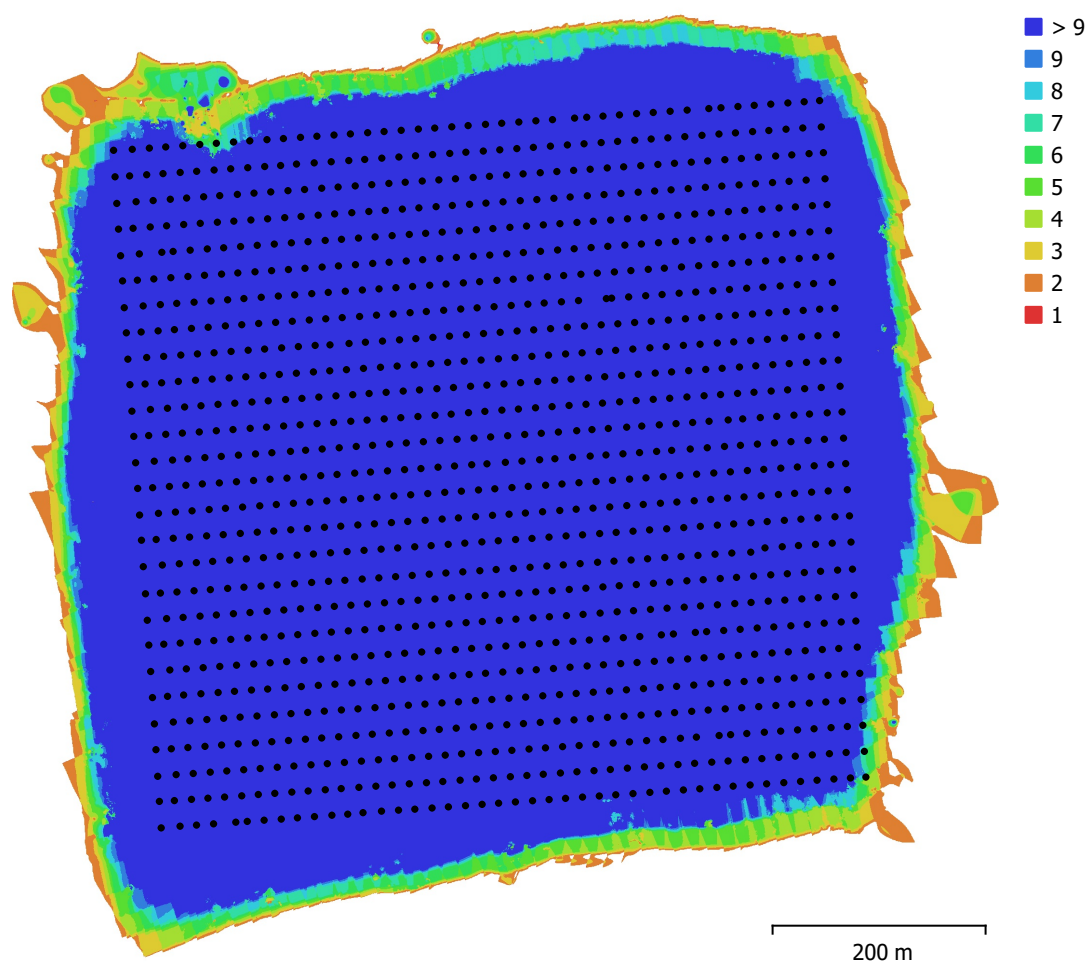

Chart 1a. Camera locations and image overlap.

|                    |                       |                     |           |
|--------------------|-----------------------|---------------------|-----------|
| Number of images:  | 1,161                 | Camera stations:    | 1,161     |
| Flying altitude:   | 139 m                 | Tie points:         | 1,977,517 |
| Ground resolution: | 3.49 cm/pix           | Projections:        | 7,225,473 |
| Coverage area:     | 0.627 km <sup>2</sup> | Reprojection error: | 1.82 pix  |

| Camera Model    | Resolution  | Focal Length | Pixel Size     | Precalibrated |
|-----------------|-------------|--------------|----------------|---------------|
| FC6310S (8.8mm) | 5472 x 3648 | 8.8 mm       | 2.41 x 2.41 μm | No            |

Chart 1b. Cameras.



# Camera Calibration

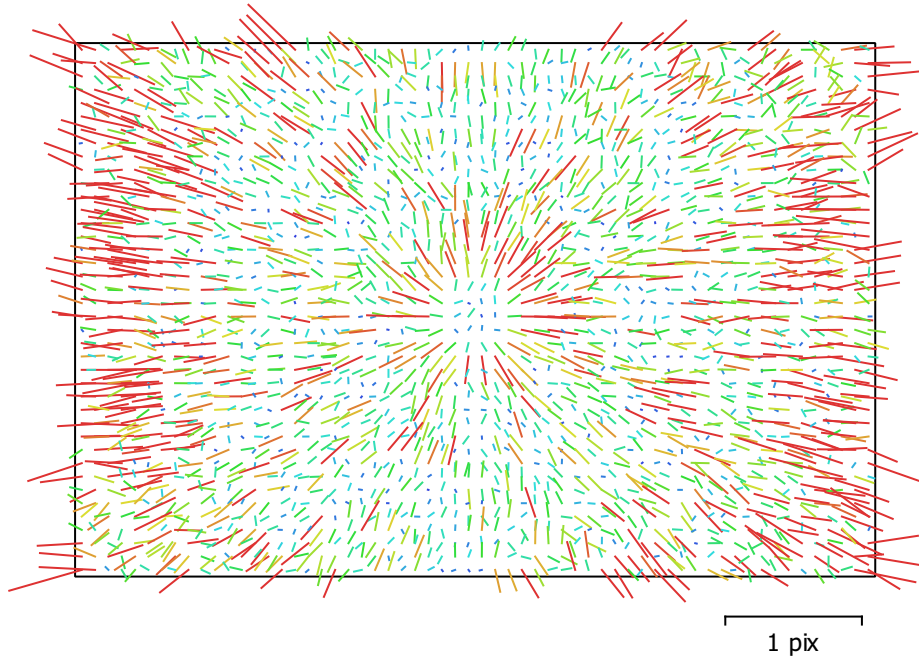

Chart 2a. Image residuals for FC6310S (8.8mm).

## FC6310S (8.8mm)

1161 images

|              |                    |               |                                             |
|--------------|--------------------|---------------|---------------------------------------------|
| Type         | Resolution         | Focal Length  | Pixel Size                                  |
| <b>Frame</b> | <b>5472 x 3648</b> | <b>8.8 mm</b> | <b>2.41 x 2.41 <math>\mu\text{m}</math></b> |

|           | Value               | Error   | F    | Cx    | Cy    | K1    | K2    | K3    | P1    | P2    |
|-----------|---------------------|---------|------|-------|-------|-------|-------|-------|-------|-------|
| <b>F</b>  | <b>3701.81</b>      | 0.75    | 1.00 | -0.34 | 0.19  | -0.14 | 0.01  | 0.20  | -0.08 | -0.42 |
| <b>Cx</b> | <b>-0.810238</b>    | 0.016   |      | 1.00  | -0.02 | 0.04  | 0.00  | -0.07 | 0.70  | 0.16  |
| <b>Cy</b> | <b>-18.1363</b>     | 0.012   |      |       | 1.00  | -0.03 | -0.00 | 0.04  | 0.02  | 0.44  |
| <b>K1</b> | <b>-0.0116346</b>   | 2.5e-05 |      |       |       | 1.00  | -0.74 | 0.66  | -0.03 | 0.05  |
| <b>K2</b> | <b>0.000279329</b>  | 5.4e-05 |      |       |       |       | 1.00  | -0.96 | 0.01  | 0.01  |
| <b>K3</b> | <b>0.00834052</b>   | 4.9e-05 |      |       |       |       |       | 1.00  | -0.02 | -0.09 |
| <b>P1</b> | <b>-0.000340577</b> | 1.1e-06 |      |       |       |       |       |       | 1.00  | 0.06  |
| <b>P2</b> | <b>-0.00161829</b>  | 8.8e-07 |      |       |       |       |       |       |       | 1.00  |

Chart 2b. Calibration coefficients and correlation matrix.

# Camera Locations

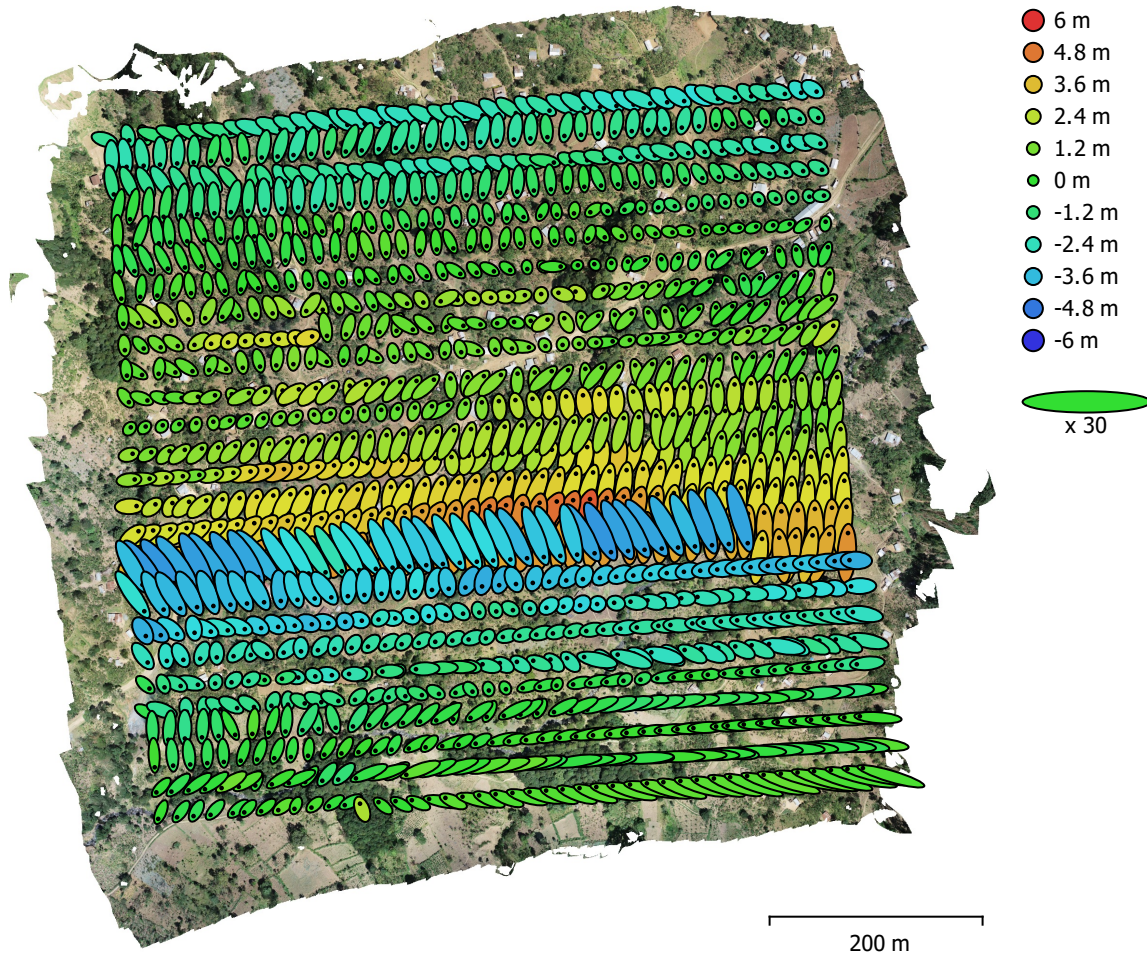

Chart 3a. Camera locations and error estimates.

Z error is represented by ellipse color. X,Y errors are represented by ellipse shape.

Estimated camera locations are marked with a black dot.

| X error (m) | Y error (m) | Z error (m) | XY error (m) | Total error (m) |
|-------------|-------------|-------------|--------------|-----------------|
| 0.450176    | 0.533175    | 2.05551     | 0.697806     | 2.17073         |

Chart 3b. Average camera location error. X  
- Longitude, Y - Latitude, Z - Altitude.

# Digital Elevation Model

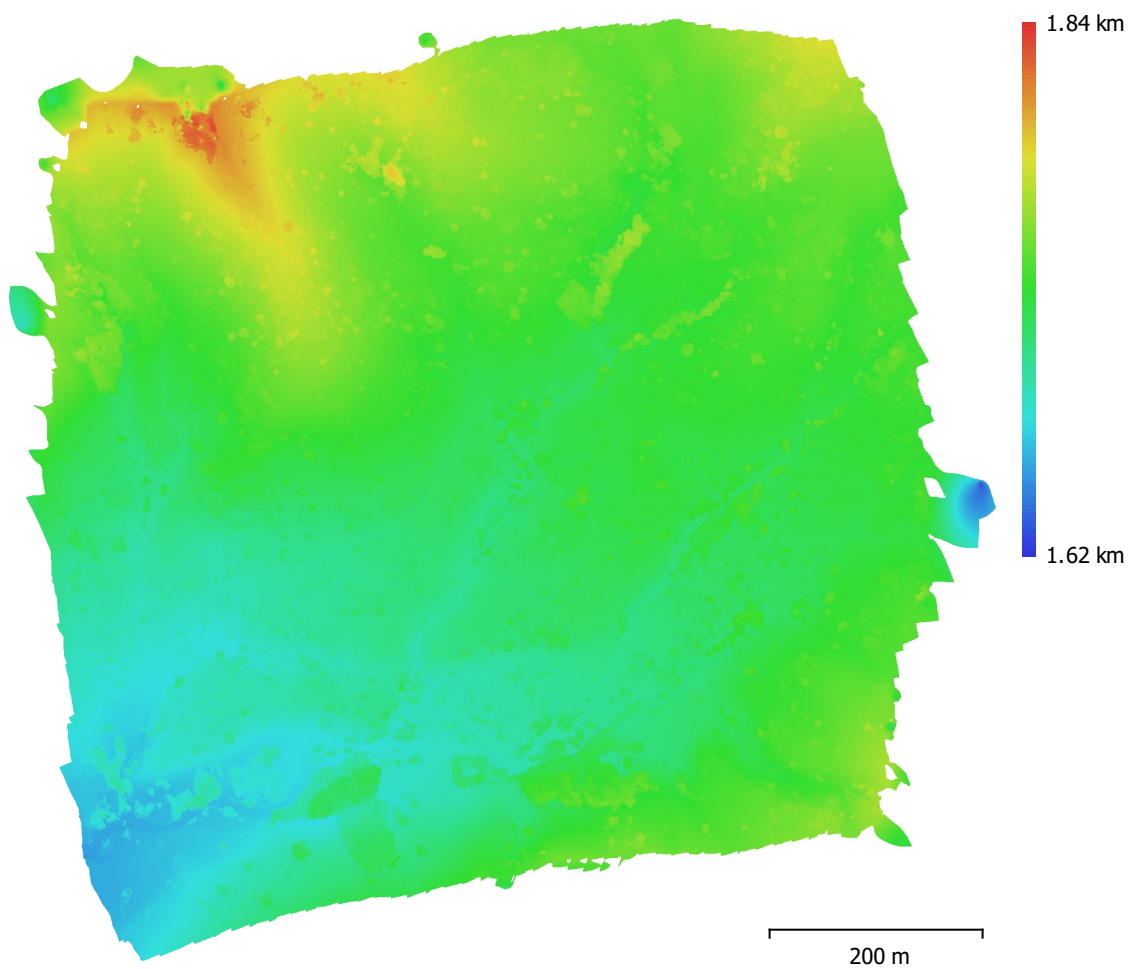

Chart 4. Reconstructed digital elevation model.

Resolution: 13.9 cm/pix  
Point density: 51.4 points/m<sup>2</sup>

# Processing Parameters

## General

|                   |                     |
|-------------------|---------------------|
| Cameras           | 1161                |
| Aligned cameras   | 1161                |
| Coordinate system | WGS 84 (EPSG::4326) |
| Rotation angles   | Yaw, Pitch, Roll    |

## Point Cloud

|                                |                        |
|--------------------------------|------------------------|
| Points                         | 1,977,517 of 2,190,738 |
| RMS reprojection error         | 0.162127 (1.81739 pix) |
| Max reprojection error         | 0.492717 (74.2706 pix) |
| Mean key point size            | 8.29033 pix            |
| Point colors                   | 3 bands, uint8         |
| Key points                     | No                     |
| Average tie point multiplicity | 4.43866                |

## Alignment parameters

|                               |                       |
|-------------------------------|-----------------------|
| Accuracy                      | Medium                |
| Generic preselection          | Yes                   |
| Reference preselection        | Source                |
| Key point limit               | 4,000,000             |
| Key point limit per Mpx       | 1,000                 |
| Tie point limit               | 4,000,000             |
| Exclude stationary tie points | No                    |
| Guided image matching         | No                    |
| Adaptive camera model fitting | No                    |
| Matching time                 | 10 minutes 39 seconds |
| Matching memory usage         | 837.12 MB             |
| Alignment time                | 12 minutes 44 seconds |
| Alignment memory usage        | 1.47 GB               |
| Date created                  | 2023:02:28 13:17:33   |
| Software version              | 1.7.3.12473           |
| File size                     | 274.09 MB             |

## Depth Maps

|                                         |                       |
|-----------------------------------------|-----------------------|
| Count                                   | 1161                  |
| <b>Depth maps generation parameters</b> |                       |
| Quality                                 | Medium                |
| Filtering mode                          | Mild                  |
| Processing time                         | 22 minutes 45 seconds |
| Memory usage                            | 3.11 GB               |
| Date created                            | 2023:02:28 13:53:18   |
| Software version                        | 1.7.3.12473           |
| File size                               | 2.41 GB               |

## Dense Point Cloud

|                                          |                       |
|------------------------------------------|-----------------------|
| Points                                   | 63,583,740            |
| Point colors                             | 3 bands, uint8        |
| <b>Depth maps generation parameters</b>  |                       |
| Quality                                  | Medium                |
| Filtering mode                           | Mild                  |
| Processing time                          | 22 minutes 45 seconds |
| Memory usage                             | 3.11 GB               |
| <b>Dense cloud generation parameters</b> |                       |
| Processing time                          | 58 minutes 45 seconds |

|                                  |                                           |
|----------------------------------|-------------------------------------------|
| Memory usage                     | 7.99 GB                                   |
| Date created                     | 2023:02:28 14:52:04                       |
| Software version                 | 1.7.3.12473                               |
| File size                        | 912.62 MB                                 |
| <b>DEM</b>                       |                                           |
| Size                             | 9,225 x 8,984                             |
| Coordinate system                | WGS 84 (EPSG::4326)                       |
| <b>Reconstruction parameters</b> |                                           |
| Source data                      | Dense cloud                               |
| Interpolation                    | Enabled                                   |
| Processing time                  | 52 seconds                                |
| Memory usage                     | 312.40 MB                                 |
| Date created                     | 2023:02:28 14:52:57                       |
| Software version                 | 1.7.3.12473                               |
| File size                        | 120.72 MB                                 |
| <b>Orthomosaic</b>               |                                           |
| Size                             | 26,576 x 25,356                           |
| Coordinate system                | WGS 84 (EPSG::4326)                       |
| Colors                           | 3 bands, uint8                            |
| <b>Reconstruction parameters</b> |                                           |
| Blending mode                    | Mosaic                                    |
| Surface                          | DEM                                       |
| Enable hole filling              | Yes                                       |
| Enable ghosting filter           | No                                        |
| Processing time                  | 16 minutes 33 seconds                     |
| Memory usage                     | 7.17 GB                                   |
| Date created                     | 2023:02:28 15:04:55                       |
| Software version                 | 1.7.3.12473                               |
| File size                        | 30.72 GB                                  |
| <b>System</b>                    |                                           |
| Software name                    | Agisoft Metashape Professional            |
| Software version                 | 1.7.3 build 12473                         |
| OS                               | Windows 64 bit                            |
| RAM                              | 63.73 GB                                  |
| CPU                              | Intel(R) Core(TM) i9-10900X CPU @ 3.70GHz |
| GPU(s)                           | NVIDIA GeForce RTX 2080 Ti                |
