# Supplementary material
Source: MDPI journal article supplement (https://www.mdpi.com/2073-445X/13/1/1)
Supplement: s1 [file s1]

Supplement Table S3: Results from binary probit regression analysis between respondents socio-economic characteristics and resource extraction, land degradation and SWC adoption.

| Independent Variables                            | Dependent Variables |            |         |                                   |            |         |                          |            |         |
|--------------------------------------------------|---------------------|------------|---------|-----------------------------------|------------|---------|--------------------------|------------|---------|
|                                                  | Resource (MENP)     |            |         | Vulnerability to land degradation |            |         | Adoption of SWC measures |            |         |
|                                                  | Extraction          |            |         |                                   |            |         |                          |            |         |
|                                                  | Coeff               | std. error | p-value | Coeff                             | std. error | p-value | Coeff                    | std. error | p-value |
| Diversified income sources<br>(Ref: agriculture) | -0,002              | 0,17       | 0,99    | -0,796                            | 0,197      | 0,000   | -0,0635682               | 0,1654887  | 0,701   |
| Land size                                        | 0,086               | 0,04       | 0,02    | 0,031                             | 0,046      | 0,499   | 0,0463047                | 0,0505426  | 0,36    |
| Household size                                   | 0,003               | 0,02       | 0,89    | 0,008                             | 0,026      | 0,766   | -0,0065163               | 0,0253875  | 0,797   |
| Education (Ref: no formal<br>education)          |                     |            |         |                                   |            |         |                          |            |         |
| Primary                                          | 0,099               | 0,29       | 0,73    | -0,601                            | 0,369      | 0,104   | -0,2811315               | 0,3023789  | 0,353   |
| Secondary                                        | -0,422              | 0,33       | 0,20    | -0,089                            | 0,390      | 0,820   | -0,1074161               | 0,3232154  | 0,74    |
| Tertiary                                         | -0,428              | 0,42       | 0,31    | -0,411                            | 0,435      | 0,345   | 0,3202886                | 0,4497159  | 0,476   |
