# Supplementary material
Source: MDPI journal article supplement (https://www.mdpi.com/2073-445X/13/1/1)
Supplement: s1 [file s1]

Supplement Table S2: Accuracy assessment for classified land use maps of the six study sites from 2020-2023.

| Site 1: Elgon        | 2020   |        | 2021   |        | 2022   |        | 2023   |        |
|----------------------|--------|--------|--------|--------|--------|--------|--------|--------|
|                      | P.A    | U.A    | P.A    | U.A    | P.A    | U.A    | P.A    | U.A    |
| Built-up area        | 81.82  | 90.00  | 80.95  | 85.00  | 75.00  | 75.00  | 90.48  | 95.00  |
| Agriculture          | 90.91  | 100.00 | 97.96  | 96.00  | 90.57  | 96.00  | 82.69  | 86.00  |
| Planted forest       | 96.15  | 83.33  | 96.30  | 86.67  | 93.10  | 90.00  | 83.33  | 83.33  |
| Bushland             | 0.00   | 0.00   | 0.00   | 0.00   | 0.00   | 0.00   | 0.00   | 0.00   |
| Grassland            | 80.00  | 80.00  | 72.73  | 80.00  | 63.64  | 70.00  | 100.00 | 80.00  |
| Bare rock & surfaces | 66.67  | 75.00  | 60.00  | 75.00  | 100.00 | 75.00  | 100.00 | 87.50  |
| Tropical high forest | 0.00   | 0.00   | 0.00   | 0.00   | 0.00   | 0.00   | 0.00   | 0.00   |
| Open water           | 83.33  | 50.00  | 80.00  | 80.00  | 88.89  | 80.00  | 100.00 | 100.00 |
| Overall accuracy     | 87.5   |        | 88.28  |        | 86.72  |        | 87.5   |        |
| Kappa coefficient    | 83.19  |        | 84.53  |        | 82.19  |        | 83.25  |        |
| Site 2: Ibookho      |        |        |        |        |        |        |        |        |
| Built-up area        | 76.92  | 100.00 | 72.73  | 80.00  | 80.00  | 80.00  | 88.89  | 80.00  |
| Agriculture          | 74.00  | 92.50  | 90.48  | 95.00  | 95.12  | 97.50  | 90.48  | 95.00  |
| Planted forest       | 95.24  | 66.67  | 93.10  | 90.00  | 96.30  | 86.67  | 89.66  | 86.67  |
| Bushland             | 100.00 | 100.00 | 100.00 | 87.50  | 100.00 | 87.50  | 100.00 | 100.00 |
| Grassland            | 72.73  | 80.00  | 69.23  | 90.00  | 83.33  | 100.00 | 83.33  | 100.00 |
| Bare rock & surfaces | 85.71  | 60.00  | 100.00 | 80.00  | 80.00  | 80.00  | 80.00  | 80.00  |
| Tropical high forest | 100.00 | 80.00  | 100.00 | 80.00  | 88.89  | 80.00  | 100.00 | 80.00  |
| Open water           | 90.00  | 90.00  | 80.00  | 80.00  | 83.64  | 77.78  | 80.00  | 80.00  |
| Overall accuracy     | 82.81  |        | 88.28  |        | 88.98  |        | 89.06  |        |
| Kappa coefficient    | 78.67  |        | 85.54  |        | 86.44  |        | 86.51  |        |
| Site 3: Muranga      |        |        |        |        |        |        |        |        |
| Built-up area        | 90.00  | 90.00  | 90.91  | 94.29  | 90.91  | 100.00 | 86.36  | 95.00  |
| Agriculture          | 90.00  | 77.14  | 100.00 | 80.00  | 88.89  | 91.43  | 96.88  | 88.57  |
| Planted forest       | 93.75  | 88.24  | 97.06  | 94.29  | 96.88  | 88.57  | 93.94  | 88.57  |
| Bushland             | 100.00 | 87.50  | 88.89  | 100.00 | 87.50  | 87.50  | 88.89  | 100.00 |
| Grassland            | 42.86  | 90.00  | 57.14  | 80.00  | 100.00 | 80.00  | 100.00 | 80.00  |
| Bare rock & surfaces | 100.00 | 70.00  | 100.00 | 70.00  | 87.50  | 70.00  | 66.67  | 80.00  |
| Tropical high forest | 0.00   | 0.00   | 0.00   | 0.00   | 0.00   | 0.00   | 0.00   | 0.00   |
| Open water           | 100.00 | 100.00 | 71.43  | 100.00 | 64.29  | 90.00  | 75.00  | 90.00  |
| Overall accuracy     | 85.04  |        | 89.06  |        | 89.06  |        | 89.06  |        |
| Kappa coefficient    | 81.66  |        | 86.58  |        | 86.42  |        | 86.50  |        |
| Site 4: Nabyoko      |        |        |        |        |        |        |        |        |
| Built-up area        | 76.92  | 100.00 | 80.00  | 80.00  | 90.91  | 90.00  | 95.00  | 95.00  |
| Agriculture          | 97.87  | 92.00  | 94.23  | 98.00  | 97.78  | 88.00  | 97.73  | 86.00  |
| Planted forest       | 90.32  | 93.33  | 93.75  | 100.00 | 90.91  | 100.00 | 90.63  | 96.67  |
| Bushland             | 0.00   | 0.00   | 0.00   | 0.00   | 0.00   | 0.00   | 0.00   | 0.00   |
| Grassland            | 72.73  | 80.00  | 88.89  | 80.00  | 72.73  | 80.00  | 83.33  | 100.00 |
| Bare rock & surfaces | 100.00 | 70.00  | 77.78  | 70.00  | 72.73  | 80.00  | 66.67  | 80.00  |
| Tropical high forest | 0.00   | 0.00   | 0.00   | 0.00   | 0.00   | 0.00   | 0.00   | 0.00   |
| Open water           | 83.33  | 62.50  | 83.33  | 62.50  | 87.50  | 87.50  | 75.00  | 75.00  |
| Overall accuracy     | 89.06  |        | 89.84  |        | 89.84  |        | 89.84  |        |
| Kappa coefficient    | 85.50  |        | 86.36  |        | 86.65  |        | 86.71  |        |

|                      |        |        |        |        |        |        |        |        |
|----------------------|--------|--------|--------|--------|--------|--------|--------|--------|
| Site 1: Elgon        | 2020   |        | 2021   |        | 2022   |        | 2023   |        |
|                      | P.A    | U.A    | P.A    | U.A    | P.A    | U.A    | P.A    | U.A    |
| Site 5: Nakhatore    | 2020   |        | 2021   |        | 2022   |        | 2023   |        |
|                      | P.A    | U.A    | P.A    | U.A    | P.A    | U.A    | P.A    | U.A    |
| Built-up area        | 80.00  | 100.00 | 83.33  | 100.00 | 80.00  | 80.00  | 80.00  | 80.00  |
| Agriculture          | 92.16  | 94.00  | 91.84  | 90.00  | 100.00 | 87.50  | 92.68  | 95.00  |
| Planted forest       | 91.43  | 84.21  | 94.29  | 86.84  | 100.00 | 96.67  | 89.66  | 86.67  |
| Bushland             | 0.00   | 0.00   | 0.00   | 0.00   | 0.00   | 0.00   | 0.00   | 0.00   |
| Grassland            | 100.00 | 85.00  | 80.00  | 80.00  | 84.38  | 90.00  | 96.43  | 90.00  |
| Bare rock & surfaces | 0.00   | 0.00   | 0.00   | 0.00   | 58.33  | 87.50  | 88.89  | 100.00 |
| Tropical high forest | 0.00   | 0.00   | 0.00   | 0.00   | 0.00   | 0.00   | 0.00   | 0.00   |
| Open water           | 0.00   | 0.00   | 0.00   | 0.00   | 90.00  | 90.00  | 72.73  | 80.00  |
| Overall accuracy     | 90.63  |        | 89.06  |        | 89.84  |        | 89.84  |        |
| Kappa coefficient    | 86.83  |        | 84.72  |        | 87.06  |        | 86.95  |        |
| Site 6: Shiteka      |        |        |        |        |        |        |        |        |
| Built-up area        | 80.00  | 80.00  | 88.89  | 80.00  | 76.92  | 100.00 | 100.00 | 100.00 |
| Agriculture          | 96.55  | 93.33  | 96.67  | 96.67  | 89.66  | 86.67  | 84.38  | 80.00  |
| Planted forest       | 96.67  | 96.67  | 100.00 | 90.00  | 100.00 | 93.33  | 100.00 | 80.00  |
| Bushland             | 75.00  | 90.00  | 91.54  | 80.00  | 75.00  | 90.00  | 71.43  | 100.00 |
| Grassland            | 81.82  | 90.00  | 90.00  | 90.00  | 69.23  | 90.00  | 88.89  | 80.00  |
| Bare rock & surfaces | 81.82  | 90.00  | 90.00  | 90.00  | 100.00 | 55.56  | 88.89  | 100.00 |
| Tropical high forest | 94.12  | 80.00  | 90.48  | 95.00  | 90.48  | 95.00  | 90.00  | 90.00  |
| Open water           | 87.50  | 87.50  | 80.00  | 90.00  | 100.00 | 80.00  | 100.00 | 100.00 |
| Overall accuracy     | 89.84  |        | 90.00  |        | 88.37  |        | 89.84  |        |
| Kappa coefficient    | 87.92  |        | 88.14  |        | 86.18  |        | 87.94  |        |
